# Supplementary material for: A case of Plasmodium malariae recurrence: recrudescence or reinfection?
Source: Springer Nature journal article supplement (doi:10.1186/s12936-019-2806-y), 2019-05-14
Supplement: MOESM2 [file 16723520]

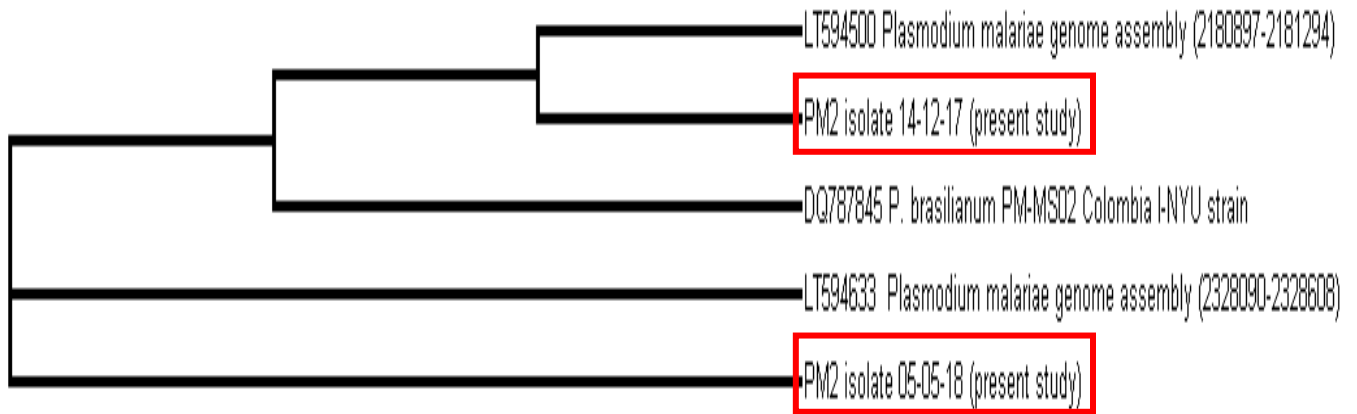

0.1
